# Supplementary material for: Three-dimensional flower-like nickel phyllosilicates for CO2methanation: enhanced catalytic activity and high stability
Source: Royal Society of Chemistry journal article supplement (doi:10.1039/d0se00360c), 2020-01-01
Supplement: d0se00360c1.pdf [file d0se00360c1.pdf]

## Supporting Information

### **Three-dimensional flower-like nickel phyllosilicates for CO<sub>2</sub> methanation: Enhanced catalytic activity and high stability**

Tengfei Zhang, Zhiwei Tian, Qing Liu\*

*Key Laboratory of Low Carbon Energy and Chemical Engineering, College of Chemical and Environmental Engineering, Shandong University of Science and Technology, Qingdao Shandong 266590, China*

\*Corresponding author. *E-mail address:* qliu@sdust.edu.cn (Q. Liu).

## S1 Experimental Section

### S1.1 Catalytic performance measurement

CO<sub>2</sub> methanation reaction was carried out in a fixed bed reactor equipped with a quartz tube at 0.1 MPa in the temperature range of 300–550 °C with an interval of 50 °C. The catalyst (0.1 g, 20–40 mesh) diluted with quartz sands (5.0 g) was uploaded in a quartz tube with an inner diameter of 8 mm. The addition of the quartz sand can avoid the generation of hotspot in the catalyst bed due to its high heat conductivity. The influence of heat and mass transfers was examined and eliminated before the catalytic tests. The catalyst was reduced at 600, 700 or 800 °C in pure H<sub>2</sub> (100 mL min<sup>-1</sup>) for 1 h and then cooled to the starting reaction temperature in H<sub>2</sub>. The reaction gas of H<sub>2</sub> and CO<sub>2</sub> as well as N<sub>2</sub> (as the internal standard) were introduced into the reactor at a molar ratio of H<sub>2</sub>/CO<sub>2</sub>/N<sub>2</sub>=12/3/5 at a total flow rate of 100 mL min<sup>-1</sup>. Inlet and outlet gases were analyzed online by a Micro GC (3000A; Agilent Technologies). The concentrations of H<sub>2</sub>, N<sub>2</sub>, CH<sub>4</sub>, and CO in the gas products were detected by a TCD detector connected to a Molecular Sieve column, while the components of CO<sub>2</sub>, C<sub>2</sub>H<sub>4</sub>, C<sub>2</sub>H<sub>6</sub>, C<sub>3</sub>H<sub>6</sub>, and C<sub>3</sub>H<sub>8</sub> were separated by a Plot Q column and analyzed by another TCD. In addition, a lifetime test of CO<sub>2</sub> methanation was performed at 450 °C and 0.1 MPa. Here, the CO<sub>2</sub> conversion, CH<sub>4</sub> selectivity, and CH<sub>4</sub> yield are defined as bellow:

$$\text{CO}_2 \text{ conversion: } X_{\text{CO}_2} (\%) = \frac{V_{\text{CO}_2,\text{in}} - V_{\text{CO}_2,\text{out}}}{V_{\text{CO}_2,\text{in}}} \times 100 \quad (1)$$

$$\text{CH}_4 \text{ selectivity: } S_{\text{CH}_4} (\%) = \frac{V_{\text{CH}_4,\text{out}}}{V_{\text{CO}_2,\text{in}} - V_{\text{CO}_2,\text{out}}} \times 100 \quad (2)$$

$$\text{CH}_4 \text{ yield: } Y_{\text{CH}_4} (\%) = \frac{V_{\text{CH}_4,\text{out}}}{V_{\text{CO}_2,\text{in}}} \times 100 \quad (3)$$

where,  $X$  is the conversion of CO<sub>2</sub>,  $S$  is the selectivity of CH<sub>4</sub>,  $Y$  is the CH<sub>4</sub> yield,  $V_{\text{CO}_2,\text{in}}$  and  $V_{\text{CO}_2,\text{out}}$  are the volume flow rates of CO<sub>2</sub> at the inlet and outlet of the reactor at standard temperature

and pressure (STP), mL s<sup>-1</sup>.

The normalized rate and activation energy for CO<sub>2</sub> methanation over the catalysts were measured at 0.1 MPa with the catalyst loading of 1.0 g (20–40 mesh) diluted with 3.0 g quartz sands (20–40 mesh). In order to lower the CO<sub>2</sub> conversion in the range of 5–10%, the experiments were performed at different total gas flow rates of 50, 100 and 200 mL min<sup>-1</sup> at the temperatures of 200, 210 and 220 °C. The rate was determined using the following equation:

$$Rate(r) = \frac{F_{CO_2} \times X_{CO_2}}{W} = \frac{X_{CO_2}}{W/F_{CO_2}} \quad (4)$$

Where  $F_{CO_2}$  represents the flow of the CO<sub>2</sub> in mol s<sup>-1</sup>,  $W$  is the weight of the catalyst in g, and  $X_{CO_2}$  the CO<sub>2</sub> conversion. The variations of  $X_{CO_2}$  with respect to  $W/F_{CO_2}$  were plotted, and then the rates of reaction were calculated at various temperatures from the slope of linear portion. The activation energy was calculated using the Arrhenius equation.

### S1.2 Hydrothermal treatments of catalysts in the 100% steam

To evaluate the hydrothermal stability of the catalysts, 0.20 g of the calcined N/M-P-30 or N/M-Im was set in the center of a tube furnace at 600 °C; simultaneously, a 100% steam flow produced by heating a flask containing deionized water was continuously charged for 6 h. The obtained sample was denoted as “N/M-P-30-H” or “N/M-Im-H”, respectively.

## S2 Results and Discussion

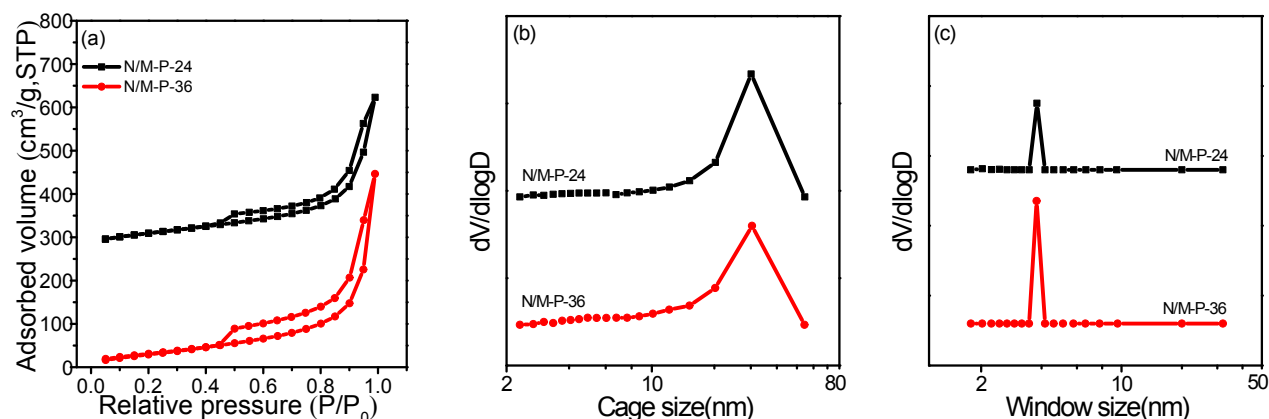

**Figure S1.** N<sub>2</sub> adsorption results of the calcined catalysts: (a) adsorption-desorption isotherms; (b) the BdB cage size distribution curve obtained from the adsorption branch; and (c) the BdB window size distribution curve obtained from desorption branch.

**Table S1.** Physical and chemical properties of the calcined catalysts.

| Samples  | Ni content <sup>a</sup><br>(wt.%) | S <sub>BET</sub> <sup>b</sup><br>(m <sup>2</sup> g <sup>-1</sup> ) | V <sub>p</sub> <sup>c</sup><br>(cm <sup>3</sup> g <sup>-1</sup> ) | D <sub>c</sub> <sup>d</sup><br>(nm) | D <sub>w</sub> <sup>e</sup><br>(nm) |
|----------|-----------------------------------|--------------------------------------------------------------------|-------------------------------------------------------------------|-------------------------------------|-------------------------------------|
| N/M-P-24 | 25.46                             | 202.1                                                              | 0.82                                                              | 30.6                                | 3.8                                 |
| N/M-P-36 | 31.87                             | 191.2                                                              | 0.75                                                              | 30.6                                | 3.8                                 |

<sup>a</sup>Ni contents determined by ICP analysis;

<sup>b</sup>Surface area, derived from BET equation;

<sup>c</sup>Pore volume, obtained from the volume of nitrogen adsorbed at the relative pressure of 0.99;

<sup>d</sup>D<sub>c</sub>, Cage size, calculated from the adsorption branches of the N<sub>2</sub> adsorption isotherms based on the BdB sphere model;

<sup>e</sup>D<sub>w</sub>, Window size, calculated from the desorption branches of the N<sub>2</sub> adsorption isotherms based on the BdB sphere model.

**Table S2.** Ni crystal size and Ni particle size of N/M-P-30-600 and N/M-P-30-800 catalysts.

| Samples      | Ni crystal size <sup>a</sup> (nm) | Ni particle size <sup>b</sup> (nm) |
|--------------|-----------------------------------|------------------------------------|
| N/M-P-30-600 | 3.4                               | –                                  |
| N/M-P-30-800 | 5.3                               | 5.4                                |

<sup>a</sup>Ni crystal size, calculated by the XRD diffraction peak ( $2\theta = 44.6$ ) using the Debye-Scherrer equation;

<sup>b</sup>Average particle size, estimated from the TEM images.
